# Supplementary material for: Lactate programs CRIP1 protein lactylation to drive synovial proliferation in rheumatoid arthritis
Source: JCI journal article supplement (doi:10.1172/jci.insight.200928), 2026-06-08
Supplement: sd1 [file 1]

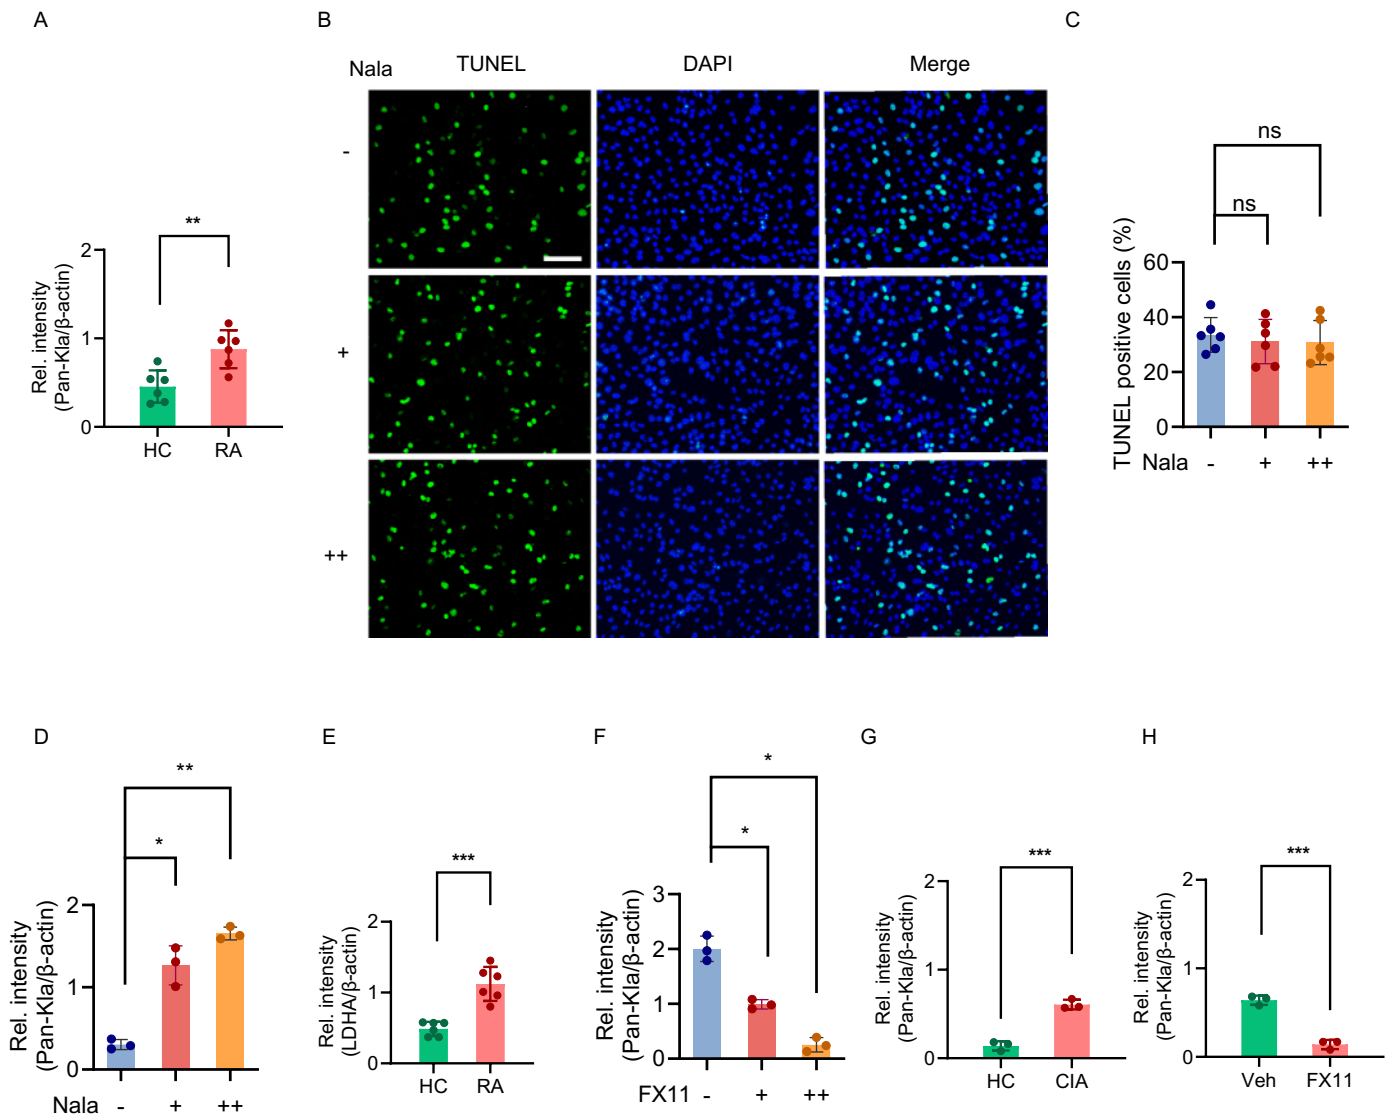

**Figure S1. Lactate promotes the synovial proliferation**

**(A)** Quantification analysis in Figure 1H. **(B–C)** TUNEL assay to assess apoptotic cells treated with Nala (10 mM, 20 mM) (n = 6). **(D)** Quantification analysis in Figure 1L. **(E)** Quantification analysis in Figure 2C. **(F)** Quantification analysis in Figure 2J. **(G)** Quantification analysis in Figure 2L. **(H)** Quantification analysis in Figure 2M. Scale bar: 100 μm. ns = no significance, \**p* < 0.05, \*\**p* < 0.01, \*\*\**p* < 0.001. Data are presented as mean ± SEM, and *p*-values are calculated using unpaired two-tailed t-test (A, E, G, H), or one-way ANOVA followed by Tukey’s post-hoc test (C, D, F).

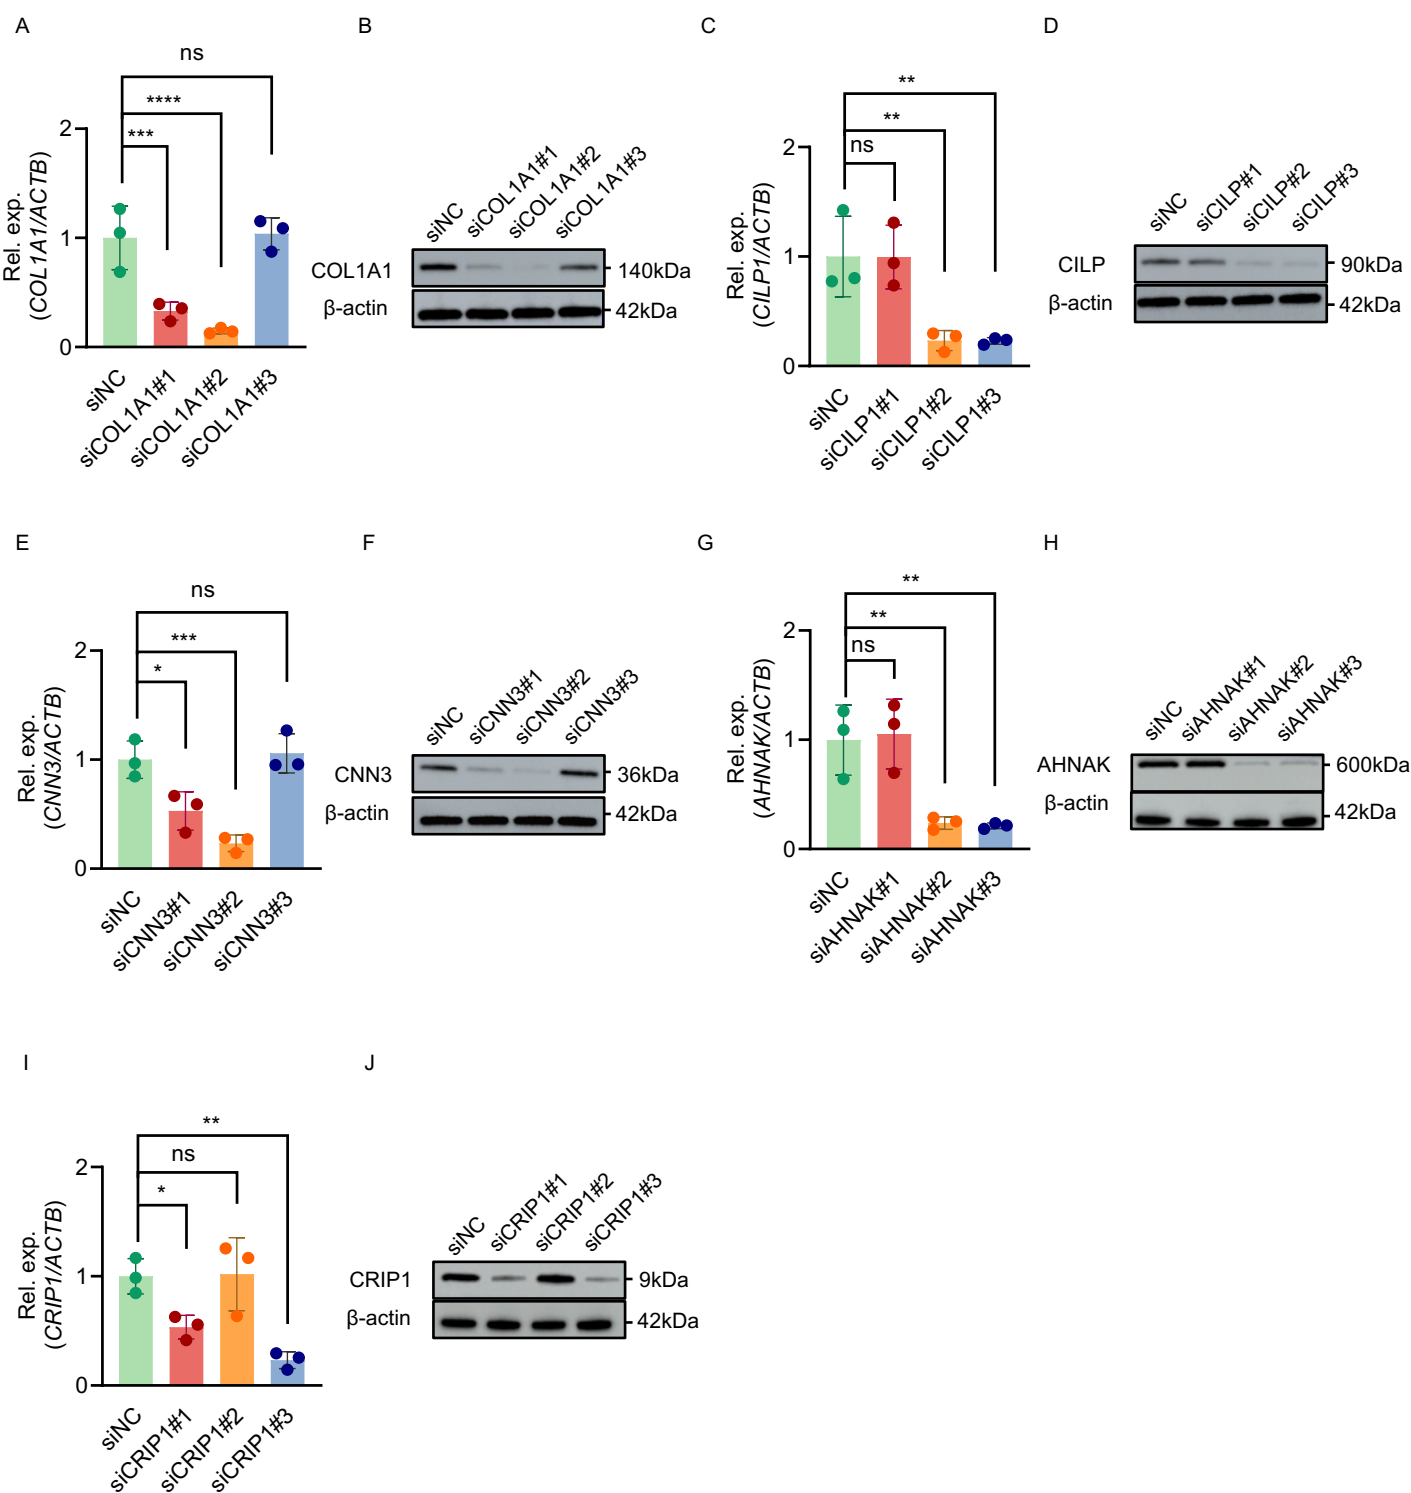

**Figure S2. Efficiency validation of lactylation protein knockdown**

qRT-PCR to quantify mRNA levels and western blotting to evaluate protein expression in RA-FLSs transfected with siCtrl or siRNA targeting *COL1A1*, *CILP*, *CNN3*, *AHNAK*, *CRIP1*. ns = no significance, \* $p < 0.05$ , \*\* $p < 0.01$ , \*\*\* $p < 0.001$ , \*\*\*\* $p < 0.0001$ . Data are presented as mean  $\pm$  SEM, and  $p$ -values are calculated using one-way ANOVA followed by Tukey's post-hoc test (A, C, E, G, I).

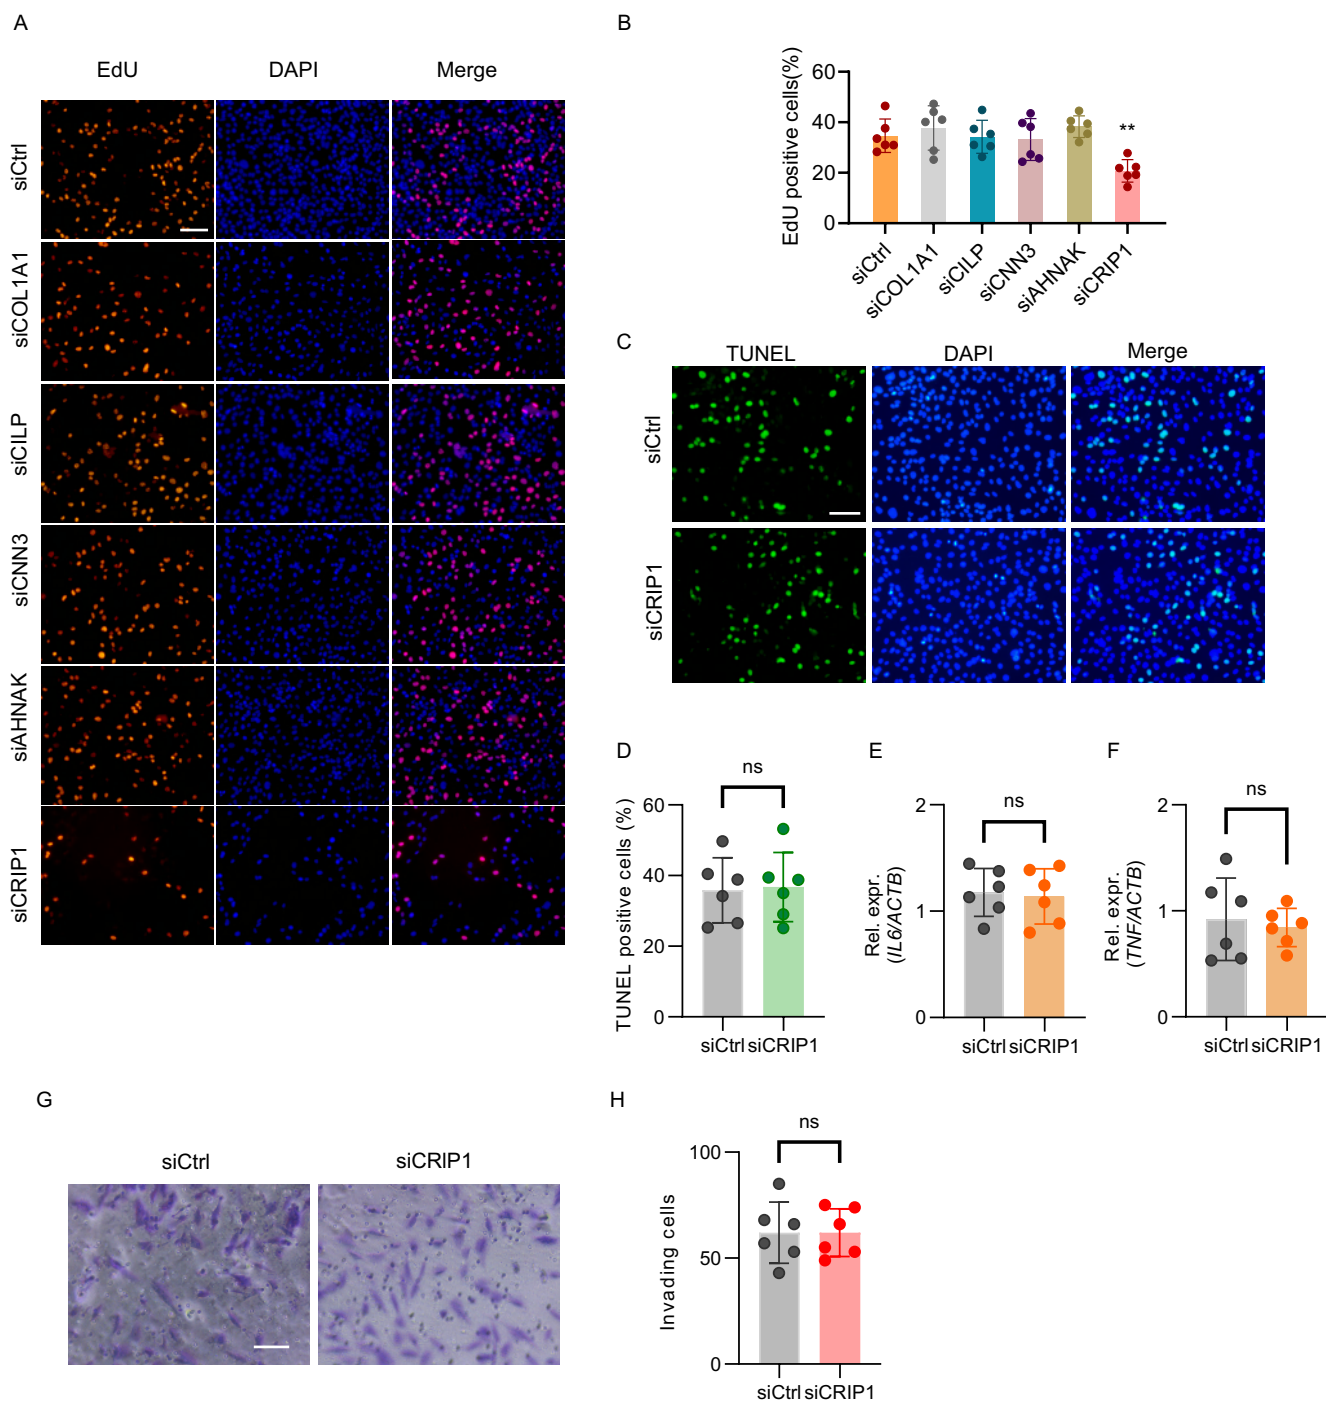

### Figure S3. CRIP1 lactylation promotes the proliferation of RA-FLSs

**(A–B)** EdU incorporation assays and quantification of cell proliferation in RA-FLSs after knockdown of the candidate genes (*COL1A1*, *CILP*, *CNN3*, *AHNAK*, *CRIP1*). Scale bar: 100  $\mu$ m. **(C–D)** TUNEL assay to assess apoptotic cells in RA-FLSs after CRIP1 knockdown. Scale bar: 100  $\mu$ m. **(E–F)** qRT-PCR to quantify mRNA levels of *IL6* and *TNF*. **(G–H)** Transwell assays to measure cell invasion. ns = no significance, \*\* $p < 0.01$ . Data are presented as mean  $\pm$  SEM, and  $p$ -values are calculated using one-way ANOVA followed by Tukey's post-hoc test (B), or unpaired two-tailed t-test (D, E, F, H).

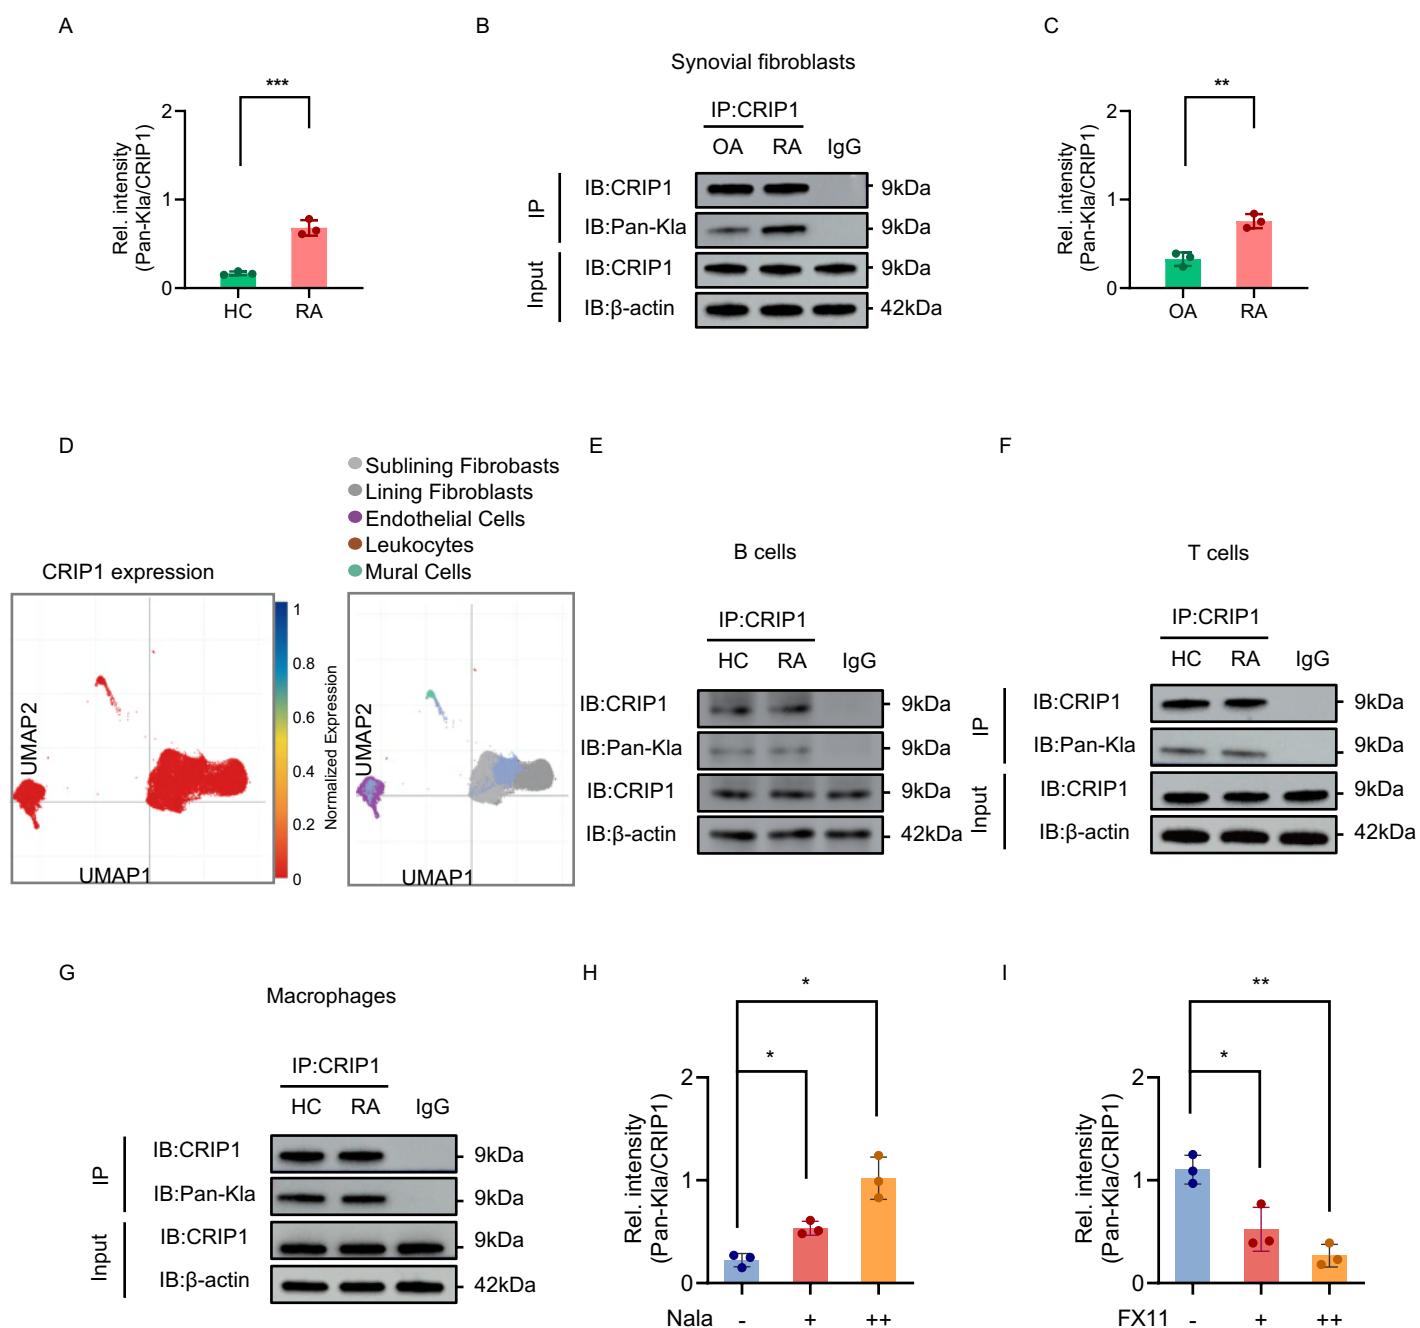

### Figure S4. CRIP1 lactylation is elevated in RA-FLSs.

(A) Quantification of Figure 3G. (B–C) Co-IP of CRIP1 followed by immunoblotting for Pan-Kla to detect CRIP1 protein lactylation in FLSs from RA and OA patients (n = 3). (D) UMAP visualization of scRNA-seq data showing CRIP1 expression across distinct cell populations in synovial tissue. (E) Co-IP of CRIP1 followed by immunoblotting for Pan-Kla to detect CRIP1 protein lactylation in B cells from RA patients and healthy controls. (F) Co-IP of CRIP1 followed by immunoblotting for Pan-Kla to detect CRIP1 protein lactylation in T cells. (G) Co-IP of CRIP1 followed by immunoblotting for Pan-Kla to detect CRIP1 protein lactylation in macrophage. (H) Quantification analysis in Figure 3I. (I) Quantification analysis in Figure 3J. \* $p < 0.05$ , \*\* $p < 0.01$ , \*\*\* $p < 0.001$ . Data are presented as mean  $\pm$  SEM, and  $p$ -values are calculated using unpaired two-tailed t-test (A, C) or one-way ANOVA followed by Tukey's post-hoc test (H, I).

Supplementary Figure 5

A

CRIP1 lactylated modification

|                              |       |
|------------------------------|-------|
| CNKEVYFAER                   | (K9)  |
| VTSLGKDWHRPCLK               | (K22) |
| PCLKCEK                      | (K30) |
| TLTSGGHAHEHGKPYCNHPCYAAMFGPK | (K49) |
| GGAESHTFK                    | (K77) |

B

Lactylated modification (K9)

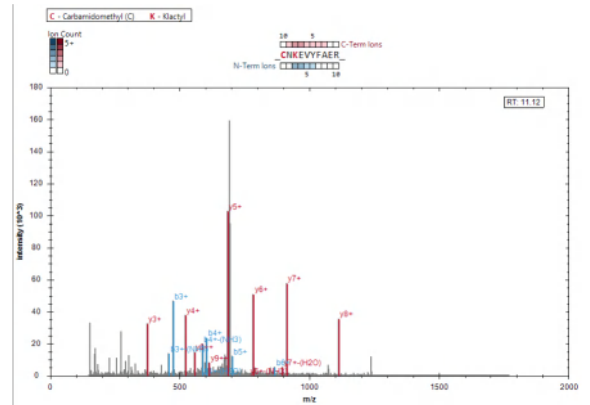

C

Lactylated modification (K22)

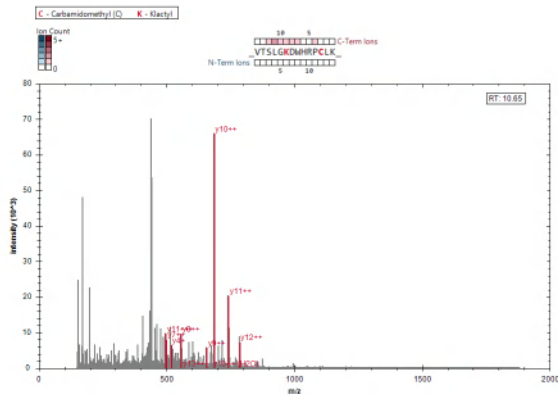

D

Lactylated modification (K30)

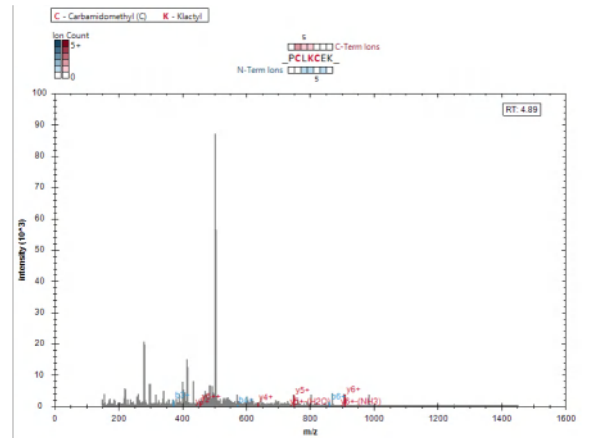

E

Lactylated modification (K77)

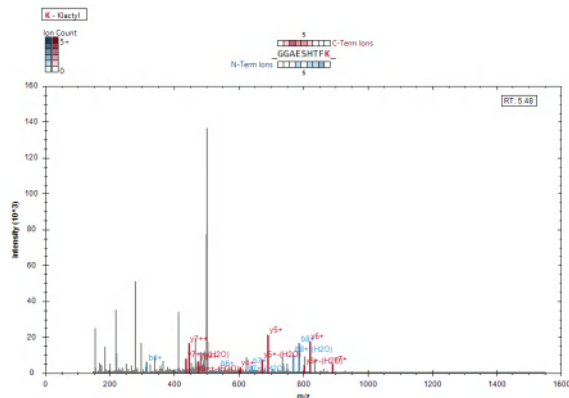

F

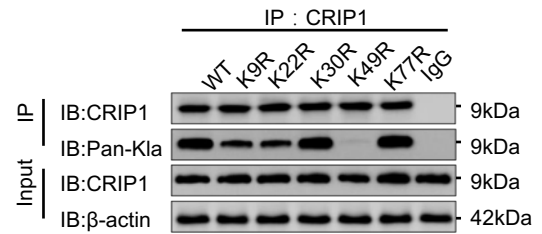

G

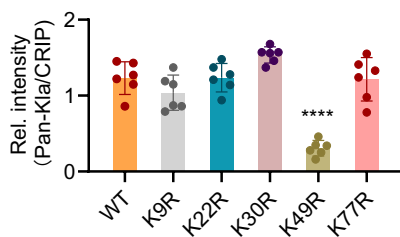

H

*Homo sapiens*  
KTLTSGGHAHEHGKPYCNHPCYAAMFGPKGF  
*Mus musculus*  
KTLTSGGHAHEHGKPYCNHPCYSAMFGPKGF  
*Rattus norvegicus*  
KTLTSGGHAHEHGKPYCNHPCYSAMFGPKGF  
*Pan paniscus*  
KTLTSGGHAHEHGKPYCNHPCYAAMFGPKGF  
*Aphelocoma coerulescens*  
KTLTSGGHAHEHDGKPYCNHPCYAALFGPKGF

Figure S5. Identification of CRIP1 lactylation sites

(A) Identification of lysine lactylation sites on CRIP1 by LC-MS/MS. (B–E) MS/MS spectrum of lysine lactylation in CRIP1. (F–G) Co-IP of CRIP1 followed by immunoblotting for Pan-Kla in RA-FLSs expressing WT or its site-specific mutants CRIP1 (K9R, K22R, K49R, and K77R) (n = 6). (H) Protein sequence alignment analysis of the CRIP1 K49 site across multiple species. \*\*\*\*p < 0.0001. Data are presented as mean ± SEM, and p-values are calculated using one-way ANOVA followed by Tukey's post-hoc test (G).

Supplementary Figure 6

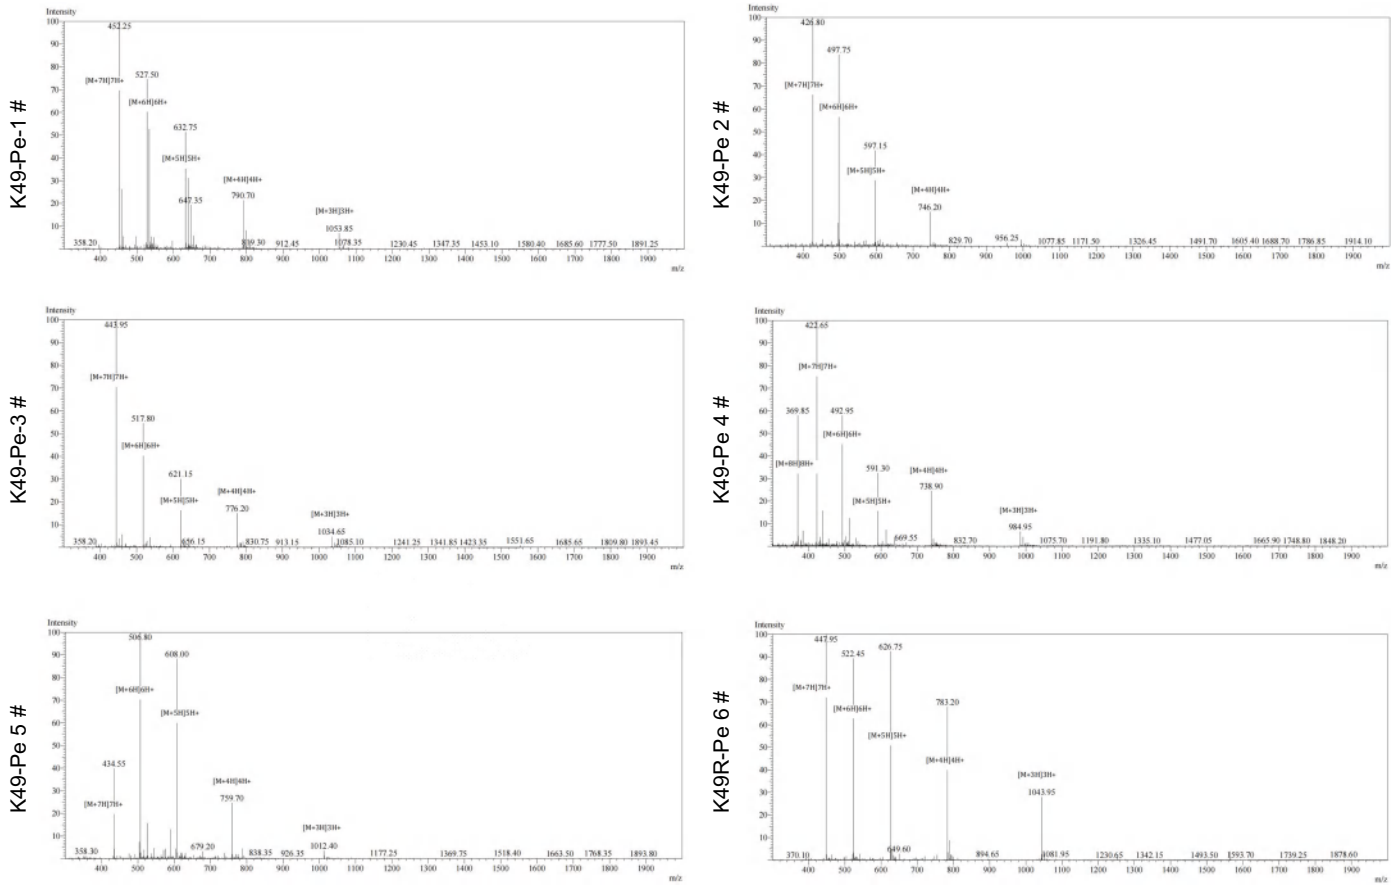

**Figure S6. Validation of CRIP1 K49-region peptides**

MS spectra of synthetic peptides (CRIP1 K49-Peptide 1–5 and K49R-Peptide 6).

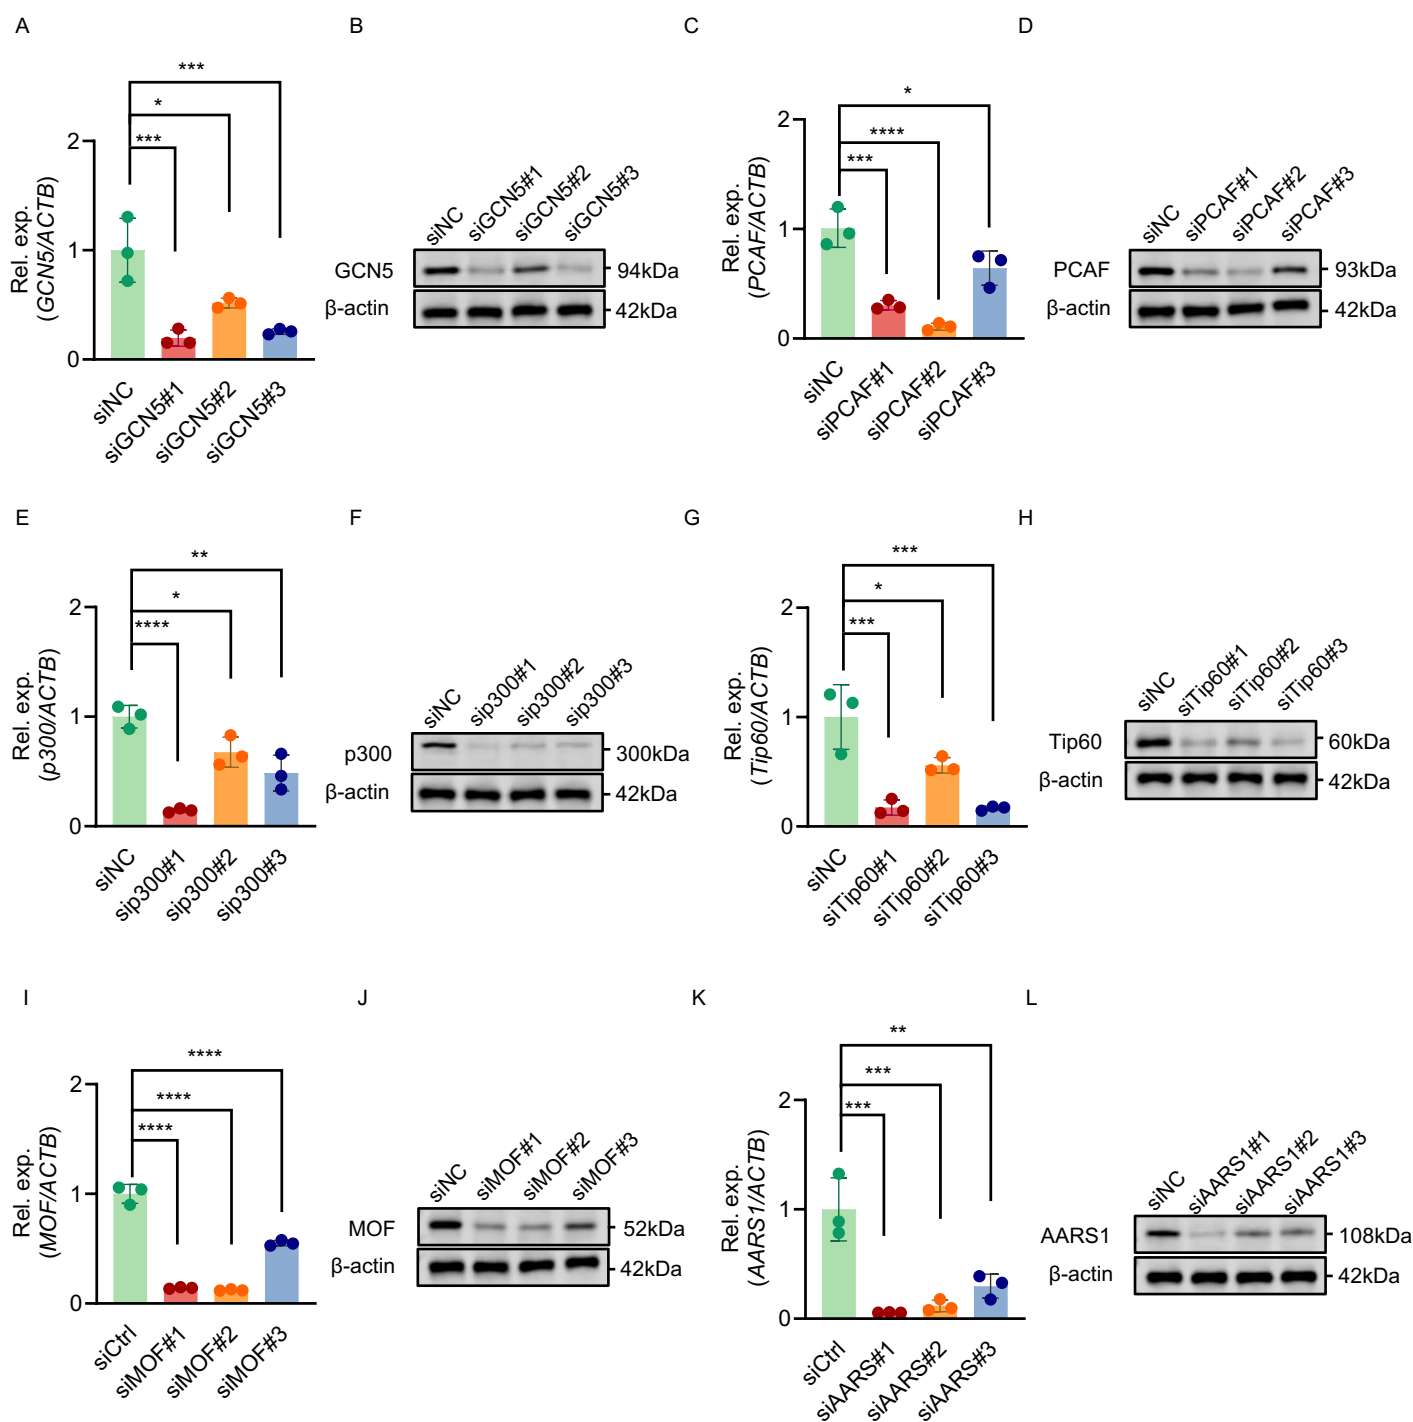

### Figure S7. Efficiency validation of lactylation enzyme knockdown

qRT-PCR to quantify mRNA levels and western blotting to evaluate protein expression in RA-FLSs transfected with siCtrl or siRNA targeting *GCN5*, *PCAF*, *p300*, *KAT5*, *KAT8*, and *AARS1*. \* $p < 0.05$ , \*\* $p < 0.01$ , \*\*\* $p < 0.001$ , \*\*\*\* $p < 0.0001$ . Data are presented as mean  $\pm$  SEM, and  $p$ -values are calculated using one-way ANOVA followed by Tukey's post-hoc test (A, C, E, G, I, K).

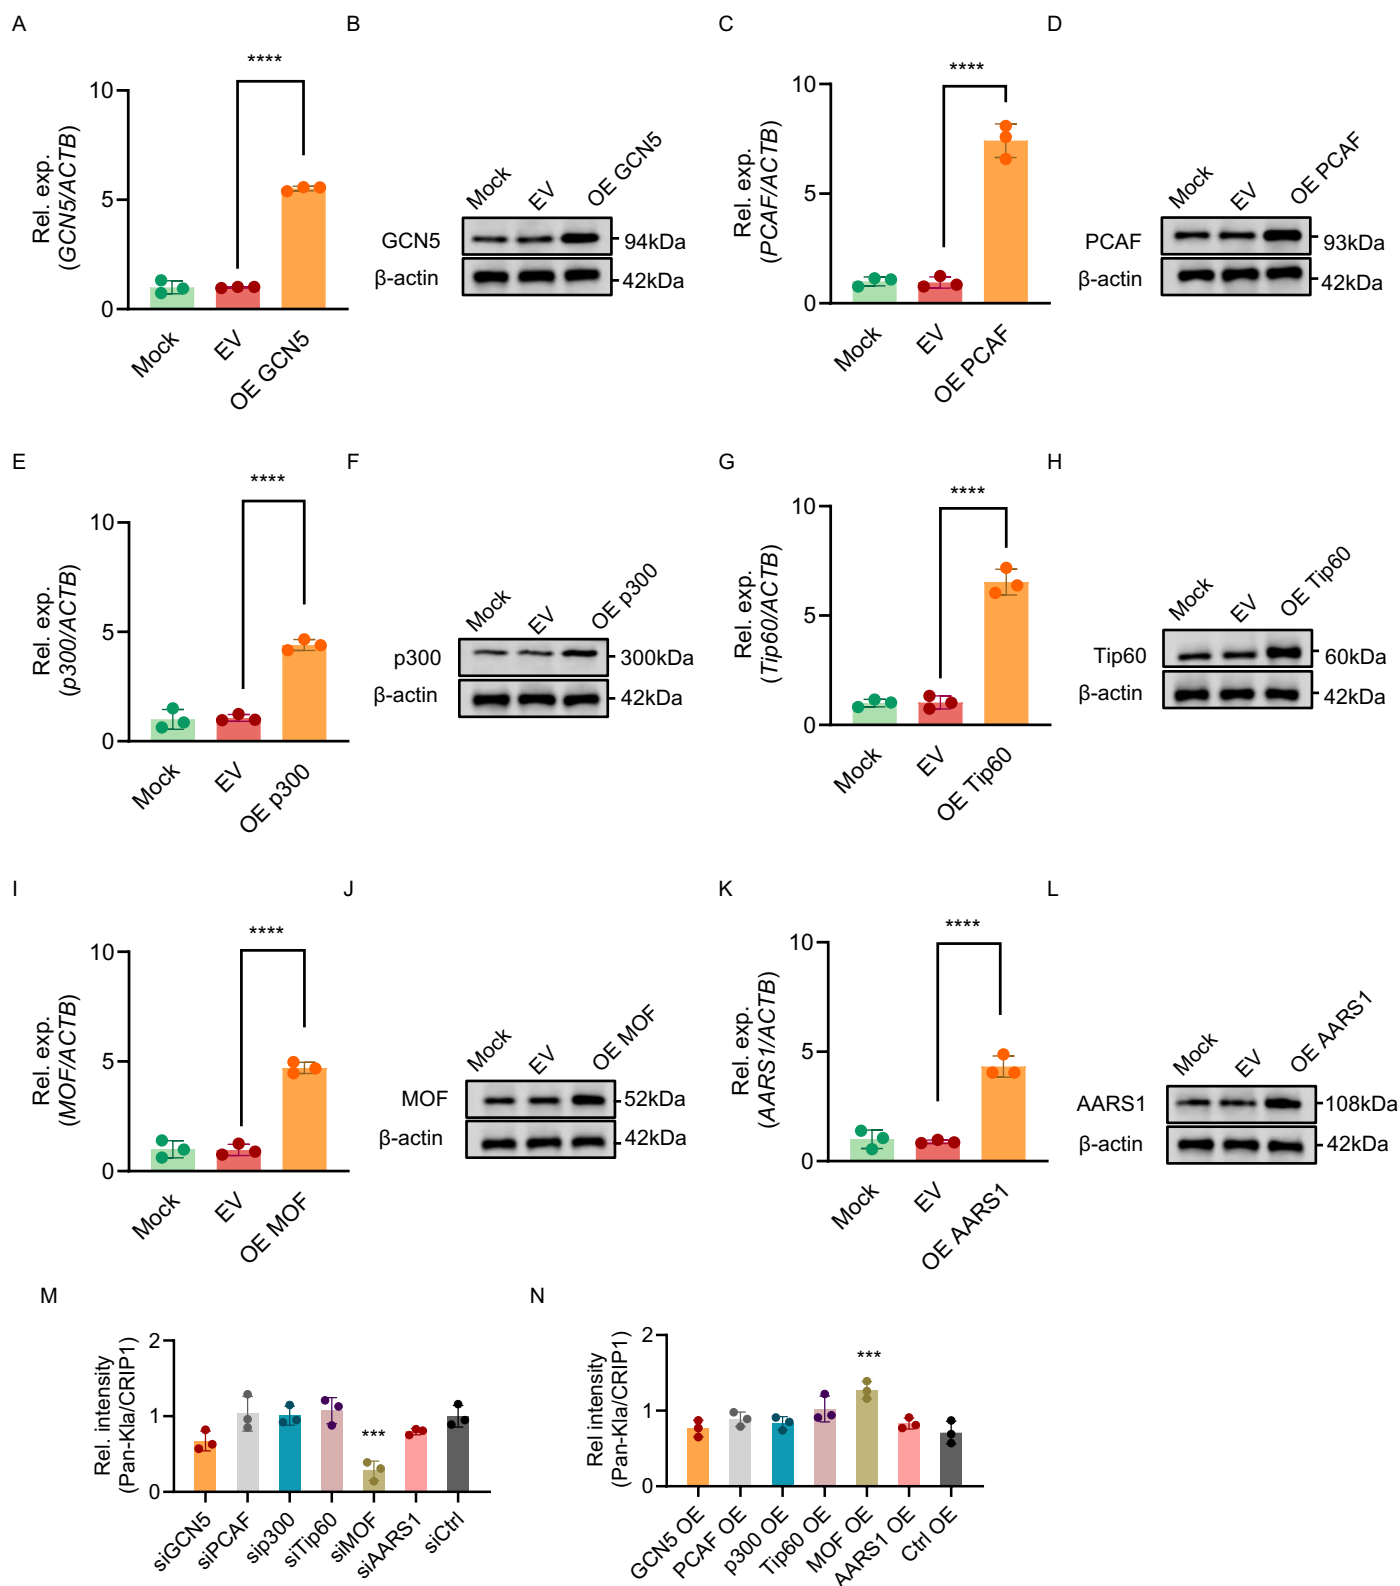

### Figure S8. Overexpression of lactylation enzyme

(A–L) qRT-PCR to quantify mRNA levels, and western blotting to evaluate protein expression in RA-FLSs transfected with mock, empty vector, or overexpression constructs (*GCN5*, *PCAF*, *p300*, *Tip60*, *MOF*, and *AARS1*). (M–N) Quantification analysis of Figure 5A–B. \*\*\* $p < 0.001$ , \*\*\*\* $p < 0.0001$ . Data are presented as mean  $\pm$  SEM, and  $p$ -values are calculated using one-way ANOVA followed by Tukey's post-hoc test (A, C, E, G, I, K, M, N).

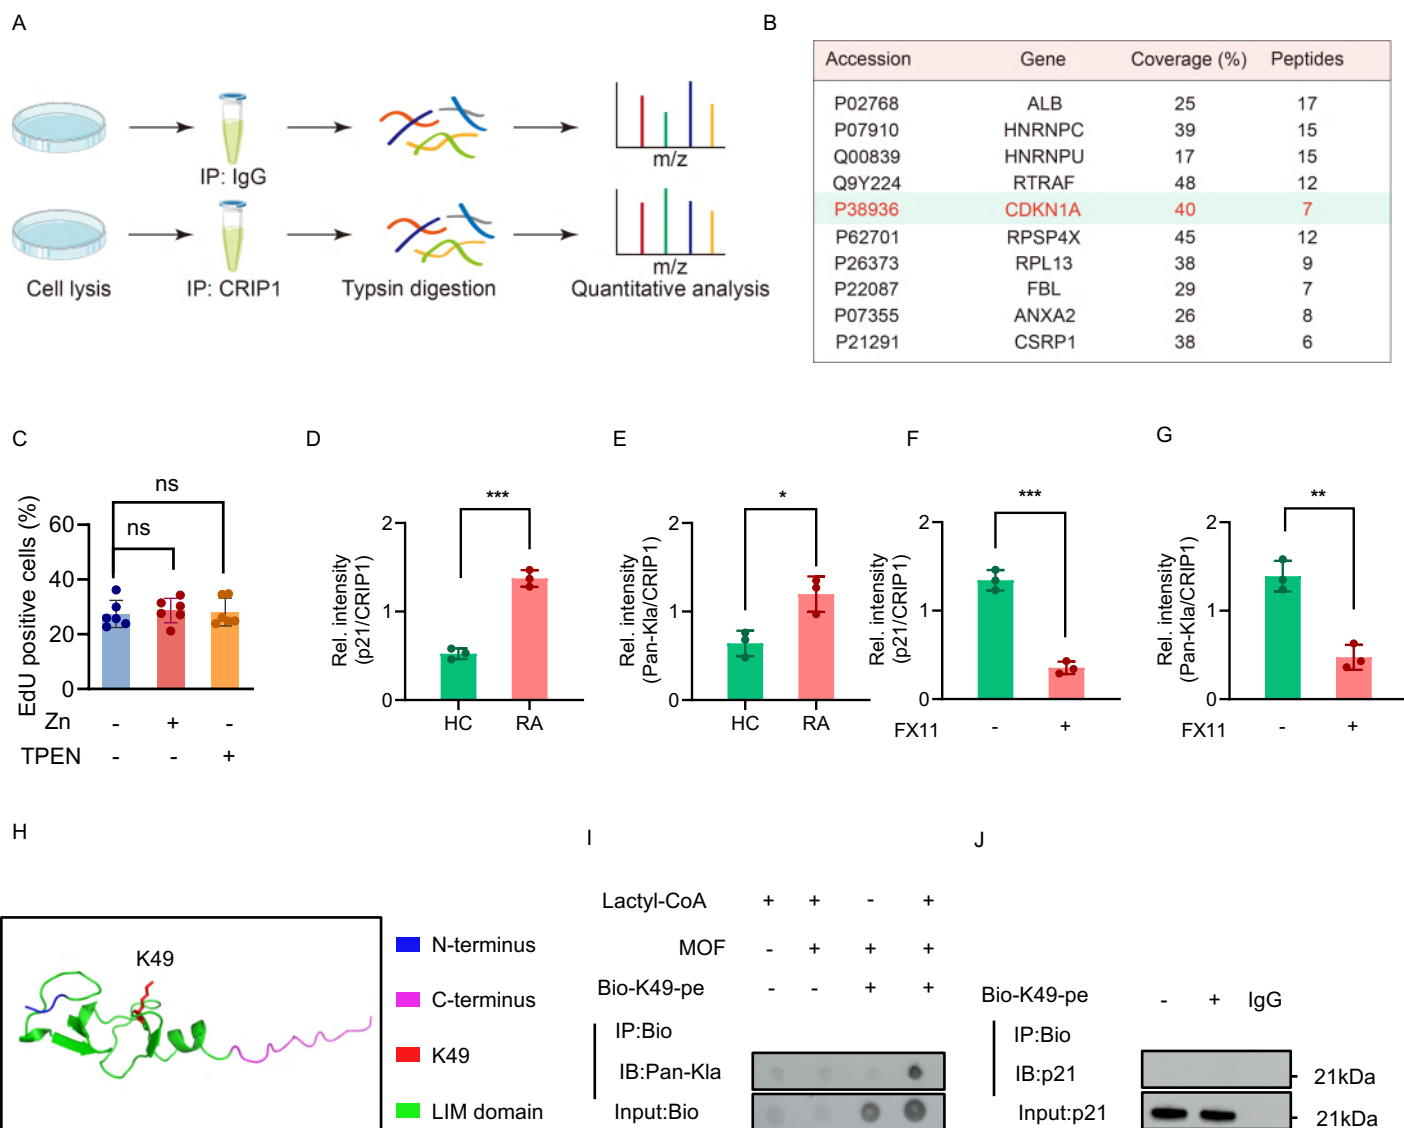

### Figure S9. Analysis of CRIP1-interacting proteins

**(A)** Schematic diagram for the immunoprecipitation–mass spectrometry (IP–MS) analysis. CRIP1 or IgG control was immunoprecipitated from cell lysates, followed by trypsin digestion and LC-MS/MS-based quantitative proteomic analysis. **(B)** List of CRIP1-associated proteins identified by IP–MS analysis. **(C)** EdU to detect cell proliferation. RA-FLSs were treated with Zn (40  $\mu$ M) or TPEN (5  $\mu$ M). **(D–E)** Quantification analysis in Figure 6E. **(F–G)** Quantification analysis in Figure 6F. **(H)** Structural representation of CRIP1. **(I)** In vitro lactylation assay to assess the lactylation of Bio-tagged peptide. **(J)** Co-IP to assess the interaction between Bio-tagged peptide and p21. ns = no significance, \* $p < 0.05$ , \*\* $p < 0.01$ , \*\*\* $p < 0.001$ . Data are presented as mean  $\pm$  SEM, and  $p$ -values are calculated using one-way ANOVA followed by Tukey's post-hoc test (C), or unpaired two-tailed t-test (D, E, F, G).

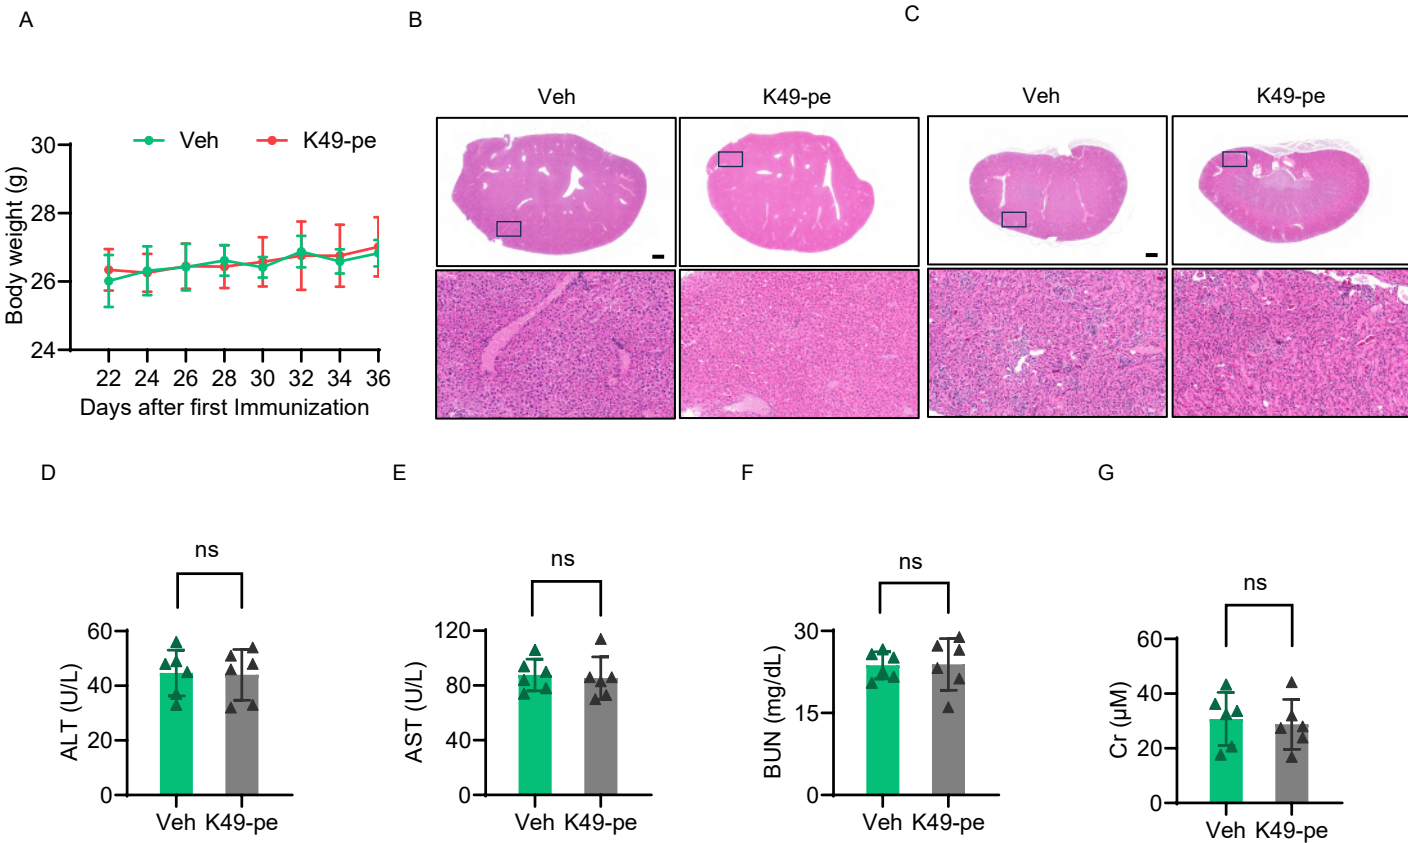

**Figure S10. Evaluation of the hepatic and renal toxicity of K49-peptide**

**(A)** Body weight in DBA/1 mice treated with either vehicle or K49-peptide. **(B–C)** Histological analysis of liver and kidney tissues. Scale bar, 500  $\mu$ m. **(D–G)** Serum ALT, AST, BUN, and Cr levels. ns = no significance. Data are presented as mean  $\pm$  SEM, and *p*-values are calculated using two-way ANOVA with Bonferroni’s post hoc test (A), or unpaired two-tailed t-test (D–G). ALT, alanine transaminase; AST, aspartate aminotransferase; BUN, blood urea nitrogen; Cr, creatinine.

## SUPPLEMENTARY TABLE

**Supplementary Table 1. Baseline data for patients**

|                             | HC (n=32)      | RA (n=38)         | p value |
|-----------------------------|----------------|-------------------|---------|
| Female: Male                | 20:12          | 30:10             | -       |
| Age (years)                 | 40.16 (19-72)  | 47.11 (22-75)     | 0.0546  |
| CRP (IU/ml)                 | 2.65 (0.5-9.1) | 30.26 (4-120.5)   | <0.0001 |
| ESR (mm/h)                  | 11.72 (5-34)   | 39.11 (10-96)     | <0.0001 |
| Disease duration<br>(years) | -              | 7.48 (1.1-15.3)   | -       |
| DAS28-ESR                   | -              | 5.02 (1.9-8.4)    | -       |
| Anti-CCP antibody<br>(U/ml) | -              | 153.44 (19.6-410) | -       |
| RF positive                 | -              | 63.2%             | -       |
| ANA-positive                | -              | 52.6%             | -       |

Statistical significance was determined using unpaired two-tailed Student's t test. ESR, Erythrocyte sedimentation rate; CRP, C-reactive protein; DAS 28: Disease activity score 28; Anti-CCP antibody: Anti-cyclic citrullinated peptide Antibody; RF: Rheumatoid factor. ANA, Anti-nuclear antibodies.

**Supplementary Table 2. Sequence of human oligonucleotides**

|                 |           |                        |
|-----------------|-----------|------------------------|
| COL1A1-siRNA #1 | sense     | CAUUGGUAAUGUUGGUGCUTT  |
|                 | antisense | AGCACCAACAUAUACCAAUGTT |
| COL1A1-siRNA #2 | sense     | CCUCAAGAUGUGCCACUCUTT  |
|                 | antisense | AGAGUGGCACAUCUUGAGGTT  |
| COL1A1-siRNA #3 | sense     | UCACCCACCGACCAAGAAATT  |
|                 | antisense | UUUCUUGGUCGGUGGGUGATT  |
| CILP- siRNA #1  | sense     | GGCUUCUUGUCCAACCCUATT  |
|                 | antisense | UAGGGUUGGACAAGAAGCCTT  |
| CILP- siRNA #2  | sense     | GAACUUCAUCAUGACGAATT   |
|                 | antisense | UUCGUCAUUGAUGAAGUUCTT  |
| CILP- siRNA #3  | sense     | GCAUCCUGAAGAUCACAAATT  |
|                 | antisense | UUUGUGAUCUUCAGGAUGCTT  |
| CNN3- siRNA #1  | sense     | GCAUCUUUAUGAUCCCAAATT  |
|                 | antisense | UUUGGGAUCAUAAAGAUGCTT  |
| CNN3- siRNA #2  | sense     | GGAACAAAUGGUUCGGAAATT  |
|                 | antisense | UUUCCGAACCAUUUGUUCCTT  |
| CNN3- siRNA #3  | sense     | GUACCAGAAGAGACAUCUATT  |
|                 | antisense | UAGAUGUCUCUUCUGGUACTT  |

|                 |           |                          |
|-----------------|-----------|--------------------------|
| AHNAK- siRNA #1 | sense     | CCACCAUCUACUUUGACAATT    |
|                 | antisense | UUGUCAAAAGUAGAUGGUGGTT   |
| AHNAK- siRNA #2 | sense     | UGCAGGAGGUGACGCAGAATT    |
|                 | antisense | UUCUGCGUCACCUCCUGCATT    |
| AHNAK- siRNA #3 | sense     | GGAUGUAGAUGUUCCTCAAATT   |
|                 | antisense | UUUGGGAACAUCUACAUCCTT    |
| CRIP1- siRNA #1 | sense     | CGCUGAGCACGAAGGCAAATT    |
|                 | antisense | UUUGCCUUCGUGCUCAGCGTT    |
| CRIP1- siRNA #2 | sense     | AGUGCAACAAGGAGGUGUATT    |
|                 | antisense | UACACCUCCUUGUUGCACUTT    |
| CRIP1- siRNA #3 | sense     | CUGCCUGAAGUGCGAGAAATT    |
|                 | antisense | UUUCUCGCACUUCAGGCAGTT    |
| GCN5-siRNA #1   | sense     | GGCUACCUACAAGGUCAAUUATT  |
|                 | antisense | UAAUUGACCUUGUAGGUAGCCTT  |
| GCN5-siRNA #2   | sense     | AGACACCAAGCAGGUCUAUUUTT  |
|                 | antisense | AAAUAGACCUUGCUUGGUGUCUTT |
| GCN5-siRNA #3   | sense     | CCACCUGAAGGAGUAUCACAUTT  |
|                 | antisense | AUGUGAUACUCCUUCAGGUGGTT  |
| PCAF-siRNA #1   | sense     | CCUAAACCGCAUCAACUAUUGTT  |
|                 | antisense | CAAUAGUUGAUGCGGUUUAGGTT  |

|                |           |                          |
|----------------|-----------|--------------------------|
| PCAF-siRNA #2  | sense     | GCAGAUACCAAACAAGUUUAUTT  |
|                | antisense | AUAAACUUGUUUGGUAUCUGCTT  |
| PCAF-siRNA #3  | sense     | CGAACUCUAAUCCUCACUCAUTT  |
|                | antisense | AUGAGUGAGGAUUAGAGUUCGTT  |
| P300-siRNA #1  | sense     | CCCGGUGAACUCUCCUAUAAUTT  |
|                | antisense | AUUAUAGGAGAGUUCACCGGGTT  |
| P300-siRNA #2  | sense     | ACCUCGUGAUGCCACUUAUUATT  |
|                | antisense | UAAUAAGUGGCAUCACGAGGUTT  |
| P300-siRNA #3  | sense     | CCAGCCUCAAAACUACAAUAAATT |
|                | antisense | UUUAUUGUAGUUUGAGGCUGGTT  |
| Tip60-siRNA #1 | sense     | CAAGUGUCUUCAGCGUCAUUUTT  |
|                | antisense | AAAUGACGCUGAAGACACUUGTT  |
| Tip60-siRNA #2 | sense     | UCGAAUUGUUUGGGCACUGAUTT  |
|                | antisense | AUCAGUGCCCAAACAAUUCGATT  |
| Tip60-siRNA #3 | sense     | GACUUCAACAAACGUCUGGAUTT  |
|                | antisense | AUCCAGACGUUUGUUGAAGUCTT  |
| MOF-siRNA #1   | sense     | ACAUCGGGAACUACGAAAUUGTT  |
|                | antisense | CAAUUUCGUAGUCCCGAUGUTT   |
| MOF-siRNA #2   | sense     | AUGGCAAAGACCAUAAGAUUUTT  |
|                | antisense | AAAUCUUAUGGUCUUUGCCAUTT  |
| MOF-siRNA #3   | sense     | GCAAGAUCACUCGCAACCAAATT  |
|                | antisense | UUUGGUUGCGAGUGAUCUUGCTT  |

|                |           |                         |
|----------------|-----------|-------------------------|
| AARS1-siRNA #1 | sense     | GUCAACCAGGACGACCCUAAUTT |
|                | antisense | AUUAGGGUCGUCCUGGUUGACTT |
| AARS1-siRNA #2 | sense     | ACAUGGUGAAGGACAUCAUUATT |
|                | antisense | UAAUGAUGUCCUUCACCAUGUTT |
| AARS1-siRNA #3 | sense     | CCCAGGCAACAUGAAGGAUAATT |
|                | antisense | UUAUCCUUCAUGUUGCCUGGGTT |

**Supplementary Table 3. Sequence of Primers**

|               |         |                         |
|---------------|---------|-------------------------|
| <i>ACTB</i>   | Forward | CGCGAGAAGATGACCCAGAT    |
|               | Reverse | TCACCGGAGTCCATCACGAT    |
| <i>COL1A1</i> | Forward | GAGGGCCAAGACGAAGACATC   |
|               | Reverse | CAGATCACGTCATCGCACAAAC  |
| <i>CILP</i>   | Forward | GCCCTGGTGAGTGGACAAC     |
|               | Reverse | GTCAGTGGTCCGAGCCTCTA    |
| <i>CNN3</i>   | Forward | GAAGAAGGTCAACGAGTCCTCA  |
|               | Reverse | AGTCTGAACCTGGGTCATGTT   |
| <i>AHNAK</i>  | Forward | TACCCTTCCTAAGGCTGACATT  |
|               | Reverse | TTGGACCCTTGAGTTTTGCAT   |
| <i>CRIP1</i>  | Forward | CCTGCCTGAAGTGCGAGAAAT   |
|               | Reverse | CCTTTAGGCCCAAACATGGC    |
| <i>PCAF</i>   | Forward | GAATCGCCGTGAAGAAAGCG    |
|               | Reverse | TACAAGACTCCTCGGCCTTG    |
| <i>P300</i>   | Forward | ACCAGGAATGACTTCTAGTTTGA |
|               | Reverse | GGGTTTGCCGGGGTACAATA    |
| <i>Tip60</i>  | Forward | AACAAACGTCTGGATGAATGGG  |
|               | Reverse | AGGAAGTCCGTTCTTAGTGGG   |
| <i>MOF</i>    | Forward | GCTGGACGAGTGGGTAGAC     |
|               | Reverse | TTTGGTTGCGAGTGATCTTGC   |
| <i>AARS1</i>  | Forward | CCGATGTCCAGAAACGAGTGT   |

|             |         |                          |
|-------------|---------|--------------------------|
|             | Reverse | ATGACAAGAGGCTGGTTGGG     |
| <i>IL6</i>  | Forward | ACTCACCTCTTCAGAACGAATTG  |
|             | Reverse | CCATCTTTGGAAGGTTTCAGGTTG |
| <i>TNF</i>  | Forward | CCTCTCTCTAATCAGCCCTCTG   |
|             | Reverse | GAGGACCTGGGAGTAGATGAG    |
| <i>IL1B</i> | Forward | ATGATGGCTTATTACAGTGGCAA  |
|             | Reverse | GTCGGAGATTCGTAGCTGGA     |
| <i>MMP1</i> | Forward | AAAATTACACGCCAGATTTGCC   |
|             | Reverse | GGTGTGACATTACTCCAGAGTTG  |
| <i>MMP9</i> | Forward | AGACCTGGGCAGATTCCAAC     |
|             | Reverse | CGGCAAGTCTTCCGAGTAGT     |
